# Supplementary material for: Rotational spectroscopy of the gas phase complex of water and bromine monochloride in the microwave region: Geometry, binding strength and charge transfer
Source: Royal Society of Chemistry journal article supplement (doi:10.1039/b103351b), 2001-01-01
Supplement: tables.pdf [file tables.pdf]

**Table S1** Observed and measured lines of H<sub>2</sub>O...<sup>79</sup>Br<sup>35</sup>Cl and H<sub>2</sub>O...<sup>81</sup>Br<sup>35</sup>Cl and H<sub>2</sub>O...<sup>79</sup>Br<sup>37</sup>Cl.

| $J'_{K-1K+1}$   | ←               | $J''_{K-1K+1}$  | $F'$            | $I'$ | ←  | $F''$ | $I''$      | H <sub>2</sub> O... <sup>79</sup> Br <sup>35</sup> Cl |                                | H <sub>2</sub> O... <sup>81</sup> Br <sup>35</sup> Cl |                                | H <sub>2</sub> O... <sup>79</sup> Br <sup>37</sup> Cl |                                | H <sub>2</sub> O... <sup>81</sup> Br <sup>37</sup> Cl |                                |      |   |
|-----------------|-----------------|-----------------|-----------------|------|----|-------|------------|-------------------------------------------------------|--------------------------------|-------------------------------------------------------|--------------------------------|-------------------------------------------------------|--------------------------------|-------------------------------------------------------|--------------------------------|------|---|
|                 |                 |                 |                 |      |    |       |            | $\nu_{\text{obs}}$ (MHz)                              | $\Delta\nu$ (kHz) <sup>a</sup> |      |   |
| 3 <sub>03</sub> | ←               | 2 <sub>02</sub> | 3               | 2    | ←  | 1     | 2          | 10143.6990                                            | -3.1                           | -                                                     | -                              | -                                                     | -                              | -                                                     | -                              | -    |   |
|                 |                 |                 |                 | 3    | 4  | ←     | 1          | 2                                                     | 10128.8856                     | -4.2                                                  | 10119.2250                     | -4.3                                                  | -                              | -                                                     | -                              | -    | - |
|                 |                 |                 | 3               | 6    | ←  | 1     | 4          | 10143.3188                                            | -1.2                           | 10133.5403                                            | -3.2                           | 9894.3855                                             | -2.0                           | 9883.9563                                             | -3.8                           | -    | - |
|                 |                 |                 |                 | 3    | 6  | ←     | 3          | 6                                                     | 9913.6817                      | 12.3                                                  | 9942.2632                      | 12.8                                                  | -                              | -                                                     | -                              | -    | - |
|                 |                 |                 | 5               | 4    | ←  | 3     | 2          | 10134.2946                                            | -4.2                           | 10125.3096                                            | -2.7                           | -                                                     | -                              | -                                                     | -                              | -    | - |
|                 |                 |                 |                 | 5    | 6  | ←     | 3          | 4                                                     | 10127.7205                     | -1.4                                                  | 10119.0273                     | -1.1                                                  | -                              | -                                                     | 9871.9337                      | -1.1 | - |
|                 |                 |                 | 5               | 6    | ←  | 5     | 6          | 9978.6164                                             | 7.2                            | -                                                     | -                              | -                                                     | -                              | -                                                     | -                              | -    | - |
|                 |                 |                 |                 | 5    | 8  | ←     | 3          | 6                                                     | 10139.5449                     | -1.1                                                  | 10130.5473                     | -1.7                                                  | 9890.7756                      | -                                                     | 9881.2266                      | -1.8 | - |
|                 |                 |                 | 5               | 8    | ←  | 5     | 8          | 9982.0178                                             | 5.0                            | 9997.5688                                             | 5.5                            | -                                                     | -                              | -                                                     | -                              | -    | - |
|                 |                 |                 |                 | 7    | 4  | ←     | 5          | 2                                                     | 10087.4661                     | 2.0                                                   | 10087.1225                     | 2.2                                                   | -                              | -                                                     | -                              | -    | - |
|                 |                 |                 | 7               | 6    | ←  | 5     | 4          | 10079.4871                                            | -                              | 10079.0232                                            | 1.0                            | 9832.1734                                             | -2.0                           | 9831.1180                                             | 2.1                            | -    | - |
|                 |                 |                 |                 | 7    | 8  | ←     | 5          | 6                                                     | 10078.6671                     | 0.1                                                   | -                              | -                                                     | 9831.3794                      | 5.3                                                   | 9830.4224                      | 0.2  | - |
|                 |                 |                 | 7               | 10   | ←  | 5     | 8          | 10085.6858                                            | 3.5                            | 10085.3234                                            | 0.1                            | 9836.9654                                             | -0.3                           | 9835.9771                                             | 3.0                            | -    | - |
|                 |                 |                 |                 | 9    | 6  | ←     | 7          | 4                                                     | 10083.6500                     | -                                                     | 10083.3021                     | -0.5                                                  | 9835.3603                      | -0.6                                                  | 9834.3376                      | 2.6  | - |
|                 |                 |                 | 9               | 8    | ←  | 7     | 6          | 10081.9741                                            | -0.2                           | 10081.6339                                            | 1.8                            | 9834.0334                                             | -2.9                           | 9833.0115                                             | 0.5                            | -    | - |
|                 |                 |                 |                 | 9    | 10 | ←     | 7          | 8                                                     | -                              | -                                                     | 10082.4304                     | 0.8                                                   | 9834.7825                      | -0.6                                                  | -                              | -    | - |
| 9               | 12              | ←               | 7               | 10   | -  | -     | 10083.9893 | 1.7                                                   | 9836.0402                      | -1.8                                                  | 9834.9603                      | 2.8                                                   | -                              | -                                                     |                                |      |   |
|                 | 3 <sub>12</sub> | ←               | 2 <sub>11</sub> | 3    | 2  | ←     | 1          | 2                                                     | 10080.9090                     | 1.6                                                   | -                              | -                                                     | -                              | -                                                     | -                              | -    |   |
| 3               |                 |                 |                 |      | 4  | ←     | 1          | 2                                                     | 10069.4555                     | -0.8                                                  | 10072.1405                     | 0.3                                                   | -                              | -                                                     | -                              | -    |   |
| 3               |                 |                 |                 | 4    | ←  | 1     | 4          | 10069.0363                                            | -0.5                           | 10071.6642                                            | 1.8                            | -                                                     | -                              | -                                                     | -                              | -    |   |
|                 |                 |                 |                 | 3    | 6  | ←     | 1          | 4                                                     | 10080.6151                     | -2.7                                                  | 10083.1854                     | -2.0                                                  | 9831.3093                      | 1.3                                                   | 9833.2711                      | -3.2 | - |
| 3               |                 |                 |                 | 6    | ←  | 3     | 6          | 9972.4931                                             | -10.4                          | 9992.2760                                             | -7.9                           | -                                                     | -                              | -                                                     | -                              | -    |   |
|                 |                 |                 |                 | 5    | 4  | ←     | 3          | 2                                                     | 10134.1473                     | 2.4                                                   | 10126.6915                     | 1.1                                                   | -                              | -                                                     | -                              | -    |   |
| 5               |                 |                 |                 | 4    | ←  | 3     | 4          | 10134.7709                                            | 1.2                            | 10127.2465                                            | -0.3                           | -                                                     | -                              | -                                                     | -                              | -    |   |
|                 |                 |                 |                 | 5    | 6  | ←     | 3          | 4                                                     | 10130.4527                     | -3.0                                                  | 10123.0517                     | 1.5                                                   | -                              | -                                                     | 9874.9822                      | 1.9  | - |

[Continued]

<sup>a</sup> $\Delta\nu = \nu_{\text{obs}} - \nu_{\text{calc}}$

**Table S1** (Continued)

| $J'_{K-1K+1}$   | ← | $J''_{K-1K+1}$  | $F'$            | $I'$ | ←               | $F''$ | $I''$ | $\text{H}_2\text{O}\cdots^{79}\text{Br}^{35}\text{Cl}$ |                                | $\text{H}_2\text{O}\cdots^{81}\text{Br}^{35}\text{Cl}$ |                                | $\text{H}_2\text{O}\cdots^{79}\text{Br}^{37}\text{Cl}$ |                                | $\text{H}_2\text{O}\cdots^{81}\text{Br}^{37}\text{Cl}$ |                                |   |   |   |
|-----------------|---|-----------------|-----------------|------|-----------------|-------|-------|--------------------------------------------------------|--------------------------------|--------------------------------------------------------|--------------------------------|--------------------------------------------------------|--------------------------------|--------------------------------------------------------|--------------------------------|---|---|---|
|                 |   |                 |                 |      |                 |       |       | $\nu_{\text{obs}}$ (MHz)                               | $\Delta\nu$ (kHz) <sup>a</sup> |   |   |   |
| 3 <sub>12</sub> | ← | 2 <sub>11</sub> | 5               | 8    | ←               | 3     | 6     | 10138.4025                                             | 2.0                            | 10130.9327                                             | 0.1                            | 9889.3825                                              | 2.5                            | 9881.3289                                              | 3.5                            |   |   |   |
|                 |   |                 | 5               | 8    | ←               | 5     | 8     | 10058.9440                                             | -1.7                           | -                                                      | -                              | -                                                      | -                              | -                                                      | -                              |   |   |   |
|                 |   |                 | 7               | 4    | ←               | 5     | 2     | 10140.5393                                             | 0.2                            | 10133.4656                                             | -2.2                           | -                                                      | -                              | -                                                      | -                              |   |   |   |
|                 |   |                 | 7               | 6    | ←               | 5     | 4     | 10131.9591                                             | -2.8                           | 10124.9282                                             | -2.2                           | 9883.8595                                              | 7.9                            | 9876.1974                                              | -0.7                           |   |   |   |
|                 |   |                 | 7               | 6    | ←               | 5     | 6     | 10134.0134                                             | -7.4                           | 10127.1428                                             | -3.7                           | -                                                      | -                              | -                                                      | -                              |   |   |   |
|                 |   |                 | 7               | 8    | ←               | 5     | 6     | 10129.6542                                             | -1.2                           | 10122.7938                                             | -2.8                           | 9881.9376                                              | -2.7                           | 9874.4013                                              | 0.5                            |   |   |   |
|                 |   |                 | 7               | 8    | ←               | 7     | 8     | 10249.7833                                             | 4.5                            | 10223.3854                                             | 5.9                            | -                                                      | -                              | -                                                      | -                              |   |   |   |
|                 |   |                 | 7               | 10   | ←               | 5     | 8     | 10137.4376                                             | 1.3                            | 10130.3937                                             | 1.7                            | 9888.1512                                              | -0.7                           | 9880.4851                                              | 0.2                            |   |   |   |
|                 |   |                 | 7               | 10   | ←               | 7     | 10    | 10250.2815                                             | 3.9                            | 10223.8186                                             | 0.9                            | -                                                      | -                              | -                                                      | -                              |   |   |   |
|                 |   |                 | 9               | 6    | ←               | 7     | 4     | 10083.8855                                             | -0.2                           | 10085.5598                                             | -1.1                           | 9834.4942                                              | -0.7                           | 9835.5136                                              | -0.9                           |   |   |   |
|                 |   |                 | 9               | 8    | ←               | 7     | 6     | 10077.9554                                             | 1.5                            | 10079.6227                                             | -0.6                           | 9829.8103                                              | -0.2                           | 9830.8171                                              | -1.0                           |   |   |   |
|                 |   |                 | 9               | 10   | ←               | 7     | 8     | 10076.8081                                             | 1.6                            | 10078.4222                                             | 0.1                            | 9828.9334                                              | -0.2                           | 9829.9066                                              | 1.9                            |   |   |   |
|                 |   |                 | 9               | 12   | ←               | 7     | 10    | -                                                      | -                              | 10084.4656                                             | -0.5                           | 9833.6729                                              | 2.4                            | 9834.6658                                              | -0.1                           |   |   |   |
|                 |   |                 | 3 <sub>13</sub> | ←    | 2 <sub>12</sub> | 3     | 2     | ←                                                      | 1                              | 2                                                      | 10061.0821                     | 0.8                                                    | 10063.6196                     | -3.1                                                   | -                              | - | - | - |
|                 |   |                 |                 |      |                 | 3     | 4     | ←                                                      | 1                              | 2                                                      | 10049.5933                     | -6.2                                                   | 10052.2265                     | 0.5                                                    | -                              | - | - | - |
| 3               | 4 | ←               |                 |      |                 | 1     | 4     | 10049.1893                                             | 4.2                            | 10051.7578                                             | 3.4                            | -                                                      | -                              | -                                                      | -                              |   |   |   |
| 3               | 6 | ←               |                 |      |                 | 1     | 4     | 10060.7978                                             | 1.9                            | 10063.3057                                             | 1.4                            | 9812.4578                                              | -3.4                           | -                                                      | -                              |   |   |   |
| 3               | 6 | ←               |                 |      |                 | 3     | 6     | 9950.7347                                              | -8.2                           | 9970.7734                                              | -3.6                           | -                                                      | -                              | -                                                      | -                              |   |   |   |
| 5               | 4 | ←               |                 |      |                 | 3     | 2     | 10114.3380                                             | 1.0                            | 10106.8175                                             | -1.1                           | -                                                      | -                              | -                                                      | -                              |   |   |   |
| 5               | 4 | ←               |                 |      |                 | 3     | 4     | 10114.9568                                             | 2.0                            | 10107.3715                                             | 2.6                            | -                                                      | -                              | -                                                      | -                              |   |   |   |
| 5               | 6 | ←               |                 |      |                 | 3     | 4     | 10110.6264                                             | 2.4                            | 10103.1563                                             | -0.1                           | 9864.1761                                              | -1.8                           | 9856.0749                                              | 3.0                            |   |   |   |
| 5               | 8 | ←               |                 |      |                 | 3     | 6     | 10118.6006                                             | 1.5                            | 10111.0678                                             | 1.6                            | 9870.5578                                              | 4.4                            | 9862.4321                                              | 0.1                            |   |   |   |
| 5               | 8 | ←               |                 |      |                 | 5     | 8     | 10037.7023                                             | -5.2                           | 10043.0771                                             | -6.9                           | -                                                      | -                              | -                                                      | -                              |   |   |   |
| 7               | 4 | ←               |                 |      |                 | 5     | 2     | 10120.2271                                             | -4.0                           | 10113.1780                                             | -0.5                           | -                                                      | -                              | -                                                      | -                              |   |   |   |
| 7               | 6 | ←               |                 |      |                 | 5     | 4     | 10111.6420                                             | -0.7                           | 10104.6329                                             | -0.3                           | 9864.5117                                              | -3.8                           | 9856.8856                                              | -0.1                           |   |   |   |

[Continued]

<sup>a</sup> $\Delta\nu = \nu_{\text{obs}} - \nu_{\text{calc}}$

**Table S1** (Continued)

| $J'_{K-1K+1}$   | ←  | $J''_{K-1K+1}$  | $F'$            | $I'$ | ←               | $F''$ | $I''$                   | $\text{H}_2\text{O}\cdots^{79}\text{Br}^{35}\text{Cl}$ |                                | $\text{H}_2\text{O}\cdots^{81}\text{Br}^{35}\text{Cl}$ |                                | $\text{H}_2\text{O}\cdots^{79}\text{Br}^{37}\text{Cl}$ |                                | $\text{H}_2\text{O}\cdots^{81}\text{Br}^{37}\text{Cl}$ |                                |   |
|-----------------|----|-----------------|-----------------|------|-----------------|-------|-------------------------|--------------------------------------------------------|--------------------------------|--------------------------------------------------------|--------------------------------|--------------------------------------------------------|--------------------------------|--------------------------------------------------------|--------------------------------|---|
|                 |    |                 |                 |      |                 |       |                         | $\nu_{\text{obs}}$ (MHz)                               | $\Delta\nu$ (kHz) <sup>a</sup> |   |
| 3 <sub>13</sub> | ←  | 2 <sub>12</sub> | 7               | 6    | ←               | 5     | 6                       | 10113.7101                                             | 2.4                            | -                                                      | -                              | -                                                      | -                              | -                                                      | -                              | - |
|                 |    |                 | 7               | 8    | ←               | 5     | 6                       | 10109.3291                                             | 0.4                            | 10102.4893                                             | -1.0                           | 9862.5956                                              | -3.8                           | 9855.0815                                              | -1.3                           | - |
|                 |    |                 | 7               | 8    | ←               | 7     | 8                       | 10231.4081                                             | 5.0                            | 10204.7076                                             | 2.5                            | -                                                      | -                              | -                                                      | -                              | - |
|                 |    |                 | 7               | 10   | ←               | 5     | 8                       | 10117.1246                                             | -1.6                           | 10110.1017                                             | 0.8                            | 9868.8222                                              | 3.4                            | 9861.1737                                              | -1.1                           | - |
|                 |    |                 | 7               | 10   | ←               | 7     | 10                      | 10231.8970                                             | -1.3                           | 10205.1459                                             | 2.3                            | -                                                      | -                              | -                                                      | -                              | - |
|                 |    |                 | 9               | 6    | ←               | 7     | 4                       | 10063.5581                                             | -0.3                           | 10065.2532                                             | -2.4                           | 9815.1449                                              | -2.8                           | 9816.1890                                              | -4.1                           | - |
|                 |    |                 | 9               | 8    | ←               | 7     | 6                       | 10057.6244                                             | 0.2                            | 10059.3159                                             | -0.1                           | 9810.4623                                              | -0.2                           | 9811.4934                                              | -2.5                           | - |
|                 |    |                 | 9               | 10   | ←               | 7     | 8                       | 10056.4802                                             | 0.5                            | 10058.1174                                             | -0.5                           | 9809.5926                                              | 5.3                            | 9810.5836                                              | -0.8                           | - |
|                 |    |                 | 9               | 12   | ←               | 7     | 10                      | 10062.5025                                             | 1.5                            | 10064.1672                                             | 2.1                            | 9814.3238                                              | -2.1                           | 9815.3476                                              | 0.2                            | - |
|                 |    |                 | 4 <sub>04</sub> | ←    | 3 <sub>03</sub> | 5     | 4                       | ←                                                      | 3                              | 2                                                      | 13471.0945                     | -4.5                                                   | -                              | -                                                      | -                              | - |
| 5               | 6  | ←               |                 |      |                 | 3     | 4                       | 13475.2361                                             | 0.8                            | 13469.3783                                             | -1.6                           | -                                                      | -                              | -                                                      | -                              | - |
| 5               | 8  | ←               |                 |      |                 | 3     | 6                       | 13479.4905                                             | -0.8                           | 13473.6025 <sup>b</sup>                                | -                              | -                                                      | -                              | -                                                      | -                              | - |
| 7               | 6  | ←               |                 |      |                 | 5     | 4                       | -                                                      | -                              | 13467.9317                                             | -0.4                           | -                                                      | -                              | -                                                      | -                              | - |
| 7               | 8  | ←               |                 |      |                 | 5     | 6                       | 13473.4402                                             | -3.0                           | 13467.8211                                             | 0.4                            | -                                                      | -                              | -                                                      | -                              | - |
| 7               | 10 | ←               |                 |      |                 | 5     | 8                       | 13478.3003                                             | 0.5                            | -                                                      | -                              | 13147.0167                                             | 0.9                            | 13140.4927                                             | -2.1                           | - |
| 9               | 6  | ←               |                 |      |                 | 7     | 4                       | 13452.2552                                             | -5.5                           | -                                                      | -                              | -                                                      | -                              | -                                                      | -                              | - |
| 9               | 8  | ←               |                 |      |                 | 7     | 6                       | 13448.9519                                             | 2.0                            | -                                                      | -                              | -                                                      | -                              | -                                                      | -                              | - |
| 9               | 10 | ←               |                 |      |                 | 7     | 8                       | 13449.6215                                             | -4.9                           | -                                                      | -                              | -                                                      | -                              | -                                                      | -                              | - |
| 9               | 12 | ←               |                 |      |                 | 7     | 10                      | 13452.7373                                             | -0.3                           | 13451.0622                                             | -3.5                           | 13121.5583                                             | -1.9                           | -                                                      | -                              | - |
| 11              | 10 | ←               |                 |      |                 | 9     | 8                       | 13450.3920 <sup>b</sup>                                | -                              | -                                                      | -                              | -                                                      | -                              | -                                                      | -                              | - |
| 11              | 12 | ←               | 9               | 10   | 13451.3215      | 0.8   | 13449.6155              | -4.1                                                   | 13120.4707                     | 5.6                                                    | 13117.9020                     | -1.4                                                   | -                              |                                                        |                                |   |
| 11              | 14 | ←               | 9               | 12   | 13452.1176      | 4.0   | 13450.3920 <sup>b</sup> | -                                                      | 13121.0993                     | -1.0                                                   | 13118.5330                     | 0.2                                                    | -                              |                                                        |                                |   |
| 4 <sub>13</sub> | ←  | 3 <sub>12</sub> | 5               | 4    | ←               | 3     | 2                       | 13463.5637                                             | 6.6                            | 13461.4342                                             | -3.0                           | -                                                      | -                              | -                                                      | -                              |   |
|                 |    |                 | 5               | 6    | ←               | 3     | 4                       | 13465.8778                                             | -1.2                           | 13463.7234                                             | -1.2                           | -                                                      | -                              | -                                                      | -                              |   |
|                 |    |                 | 5               | 8    | ←               | 3     | 6                       | 13470.7583                                             | 2.0                            | 13468.6195                                             | 2.8                            | 13138.7217                                             | 0.4                            | 13135.7376                                             | 2.8                            |   |
|                 |    |                 | 7               | 4    | ←               | 5     | 2                       | 13494.4341                                             | -6.3                           | 13488.3198                                             | -0.9                           | -                                                      | -                              | -                                                      | -                              |   |

[Continued]

<sup>a</sup>  $\Delta\nu = \nu_{\text{obs}} - \nu_{\text{calc}}$ 
<sup>b</sup> Line not included in fit

**Table S1** (Continued)

| $J'_{K-1K+1}$   | ←  | $J''_{K-1K+1}$  | $F'$ | $I'$ | ←          | $F''$ | $I''$      | $\text{H}_2\text{O}\cdots^{79}\text{Br}^{35}\text{Cl}$ |                                | $\text{H}_2\text{O}\cdots^{81}\text{Br}^{35}\text{Cl}$ |                                | $\text{H}_2\text{O}\cdots^{79}\text{Br}^{37}\text{Cl}$ |                                | $\text{H}_2\text{O}\cdots^{81}\text{Br}^{37}\text{Cl}$ |                                |
|-----------------|----|-----------------|------|------|------------|-------|------------|--------------------------------------------------------|--------------------------------|--------------------------------------------------------|--------------------------------|--------------------------------------------------------|--------------------------------|--------------------------------------------------------|--------------------------------|
|                 |    |                 |      |      |            |       |            | $\nu_{\text{obs}}$ (MHz)                               | $\Delta\nu$ (kHz) <sup>a</sup> |
| 4 <sub>13</sub> | ←  | 3 <sub>12</sub> | 7    | 6    | ←          | 5     | 4          | 13489.1351                                             | -1.4                           | 13483.0451                                             | -1.6                           | -                                                      | -                              | -                                                      | -                              |
|                 |    |                 | 7    | 8    | ←          | 5     | 6          | 13488.5332                                             | -0.2                           | 13482.4541                                             | 3.2                            | 13157.6759                                             | -5.9                           | 13150.7466                                             | 0.8                            |
|                 |    |                 | 7    | 10   | ←          | 5     | 8          | 13493.6795                                             | 2.2                            | 13487.5217                                             | 2.6                            | 13161.7937                                             | 4.3                            | 13154.8169                                             | 0.6                            |
|                 |    |                 | 9    | 6    | ←          | 7     | 4          | 13482.2935                                             | -3.5                           | 13478.0981                                             | -5.6                           | -                                                      | -                              | -                                                      | -                              |
|                 |    |                 | 9    | 8    | ←          | 7     | 6          | 13477.7481                                             | 0.4                            | 13473.5610 <sup>b</sup>                                | -                              | 13146.7395                                             | 1.2                            | 13141.7201                                             | -0.1                           |
|                 |    |                 | 9    | 10   | ←          | 7     | 8          | 13477.6664                                             | 1.4                            | 13473.5971                                             | 9.2                            | 13146.5984                                             | -3.2                           | 13141.6362                                             | -5.2                           |
|                 |    |                 | 9    | 12   | ←          | 7     | 10         | 13481.9169                                             | 2.9                            | 13477.7481                                             | -0.7                           | 13150.0010                                             | 1.7                            | 13144.9909                                             | 1.2                            |
|                 |    |                 | 11   | 8    | ←          | 9     | 6          | 13459.7100                                             | -3.8                           | 13459.0346                                             | 1.5                            | 13127.9142                                             | -6.6                           | 13126.3771                                             | 1.1                            |
|                 |    |                 | 11   | 10   | ←          | 9     | 8          | 13456.8634                                             | 3.6                            | 13456.1590                                             | -0.5                           | 13125.6791                                             | -1.6                           | 13124.1178                                             | -3.0                           |
|                 |    |                 | 11   | 12   | ←          | 9     | 10         | 13457.0149                                             | 1.4                            | 13456.3076                                             | 1.6                            | 13125.8039                                             | -0.9                           | -                                                      | -                              |
|                 |    |                 | 11   | 14   | ←          | 9     | 12         | 13459.7991                                             | 3.9                            | 13459.0904                                             | -0.1                           | 13128.0034                                             | 3.3                            | 13126.4404                                             | 0.4                            |
| 4 <sub>14</sub> | ←  | 3 <sub>13</sub> | 5    | 6    | ←          | 3     | 4          | 13439.0785                                             | 7.9                            | 13436.8993                                             | 1.7                            | -                                                      | -                              | -                                                      | -                              |
|                 |    |                 | 5    | 8    | ←          | 3     | 6          | 13443.9601                                             | 2.9                            | 13441.7985                                             | 0.9                            | 13113.2278                                             | 2.0                            | 13110.2215                                             | -                              |
|                 |    |                 | 7    | 4    | ←          | 5     | 2          | -                                                      | -                              | 13461.5012                                             | -3.7                           | -                                                      | -                              | -                                                      | -                              |
|                 |    |                 | 7    | 6    | ←          | 5     | 4          | 13462.3276                                             | -1.0                           | 13456.2157                                             | -4.3                           | -                                                      | -                              | -                                                      | -                              |
|                 |    |                 | 7    | 8    | ←          | 5     | 6          | 13461.7271                                             | 1.8                            | 13455.6259                                             | 1.6                            | 13132.1844                                             | 1.4                            | 13125.2264                                             | -2.9                           |
|                 |    |                 | 7    | 10   | ←          | 5     | 8          | 13466.8804                                             | -1.1                           | 13460.7068                                             | 2.7                            | 13136.3000                                             | 3.4                            | 13129.3093                                             | 3.6                            |
|                 |    |                 | 7    | 10   | ←          | 7     | 10         | 13387.4579                                             | -4.9                           | 13393.6825                                             | -4.7                           | -                                                      | -                              | -                                                      | -                              |
|                 |    |                 | 9    | 6    | ←          | 7     | 4          | 13455.2645                                             | -1.7                           | 13451.1056 <sup>b</sup>                                | -                              | -                                                      | -                              | -                                                      | -                              |
|                 |    |                 | 9    | 8    | ←          | 7     | 6          | 13450.7475 <sup>b</sup>                                | -                              | 13446.5417 <sup>b</sup>                                | -                              | 13121.0115                                             | 1.6                            | -                                                      | -                              |
|                 |    |                 | 9    | 10   | ←          | 7     | 8          | 13450.6175 <sup>b</sup>                                | -                              | 13446.5722 <sup>b</sup>                                | -                              | 13120.8715                                             | -0.1                           | 13115.9302                                             | -4.1                           |
|                 |    |                 | 9    | 12   | ←          | 7     | 10         | 13454.8803                                             | -2.8                           | 13450.7476 <sup>b</sup>                                | -                              | 13124.2563                                             | -16.6                          | 13119.2916                                             | 5.2                            |
| 11              | 8  | ←               | 9    | 6    | 13432.6745 | 0.2   | 13432.0181 | 4.5                                                    | 13102.1898                     | 1.9                                                    | 13100.6674                     | -                                                      |                                |                                                        |                                |
| 11              | 10 | ←               | 9    | 8    | 13429.8205 | 1.3   | 13429.1405 | 1.1                                                    | 13099.9505                     | 2.9                                                    | 13098.4171                     | 5.0                                                    |                                |                                                        |                                |
| 11              | 12 | ←               | 9    | 10   | 13429.9749 | -     | 13429.2887 | 1.0                                                    | 13100.0751                     | 2.5                                                    | 13098.5306                     | -1.5                                                   |                                |                                                        |                                |
| 11              | 14 | ←               | 9    | 12   | 13432.7589 | 0.4   | 13432.0747 | 0.9                                                    | 13102.2735                     | 4.7                                                    | 13100.7325                     | -0.5                                                   |                                |                                                        |                                |

<sup>a</sup>  $\Delta\nu = \nu_{\text{obs}} - \nu_{\text{calc}}$

<sup>b</sup> Line not included in fit

**Table S2** Observed and measured lines of  $\text{D}_2\text{O}\cdots^{79}\text{Br}^{35}\text{Cl}$  and  $\text{D}_2\text{O}\cdots^{81}\text{Br}^{35}\text{Cl}$  and  $\text{HDO}\cdots^{79}\text{Br}^{35}\text{Cl}$  and  $\text{HDO}\cdots^{81}\text{Br}^{35}\text{Cl}$ .

| $J'_{K-1K+1}$   | $\leftarrow$ | $J''_{K-1K+1}$  | $F'$ | $I'$ | $\leftarrow$ | $F''$ | $I''$     | $\text{D}_2\text{O}\cdots^{79}\text{Br}^{35}\text{Cl}$ |                                | $\text{D}_2\text{O}\cdots^{81}\text{Br}^{35}\text{Cl}$ |                                | $\text{HDO}\cdots^{79}\text{Br}^{35}\text{Cl}$ |                                | $\text{HDO}\cdots^{81}\text{Br}^{35}\text{Cl}$ |                                |
|-----------------|--------------|-----------------|------|------|--------------|-------|-----------|--------------------------------------------------------|--------------------------------|--------------------------------------------------------|--------------------------------|------------------------------------------------|--------------------------------|------------------------------------------------|--------------------------------|
|                 |              |                 |      |      |              |       |           | $\nu_{\text{obs}}$ (MHz)                               | $\Delta\nu$ (kHz) <sup>a</sup> | $\nu_{\text{obs}}$ (MHz)                               | $\Delta\nu$ (kHz) <sup>a</sup> | $\nu_{\text{obs}}$ (MHz)                       | $\Delta\nu$ (kHz) <sup>a</sup> | $\nu_{\text{obs}}$ (MHz)                       | $\Delta\nu$ (kHz) <sup>a</sup> |
| 3 <sub>03</sub> | $\leftarrow$ | 2 <sub>02</sub> | 2    | 2    | $\leftarrow$ | 2     | 2         | 9421.4671                                              | 1.0                            | 9412.9845                                              | -0.5                           | 9765.2007                                      | 1.8                            | 9756.2022                                      | 0.5                            |
|                 |              |                 | 2    | 2    | $\leftarrow$ | 2     | 2         | -                                                      | -                              | -                                                      | -                              | -                                              | 9563.3706                      | 9.4                                            |                                |
|                 |              |                 | 4    | 2    | $\leftarrow$ | 4     | 2         | 9406.6881                                              | -2.7                           | 9398.2343                                              | 3.0                            | 9750.4081                                      | 1.1                            | 9741.4339                                      | -0.1                           |
|                 |              |                 | 4    | 2    | $\leftarrow$ | 4     | 2         | 9406.1489                                              | 8.5                            | 9397.5626                                              | 1.7                            | 9749.8553                                      | 2.7                            | 9740.7659                                      | 6.3                            |
|                 |              |                 | 4    | 2    | $\leftarrow$ | 4     | 2         | -                                                      | -                              | -                                                      | -                              | 9519.1255                                      | 1.5                            | -                                              | -                              |
|                 |              |                 | 4    | 2    | $\leftarrow$ | 4     | 2         | -                                                      | -                              | -                                                      | -                              | 9520.0519                                      | 1.8                            | -                                              | -                              |
|                 |              |                 | 6    | 2    | $\leftarrow$ | 6     | 2         | 9421.0890                                              | 0.0                            | 9412.5184                                              | -1.8                           | 9764.8212                                      | 1.9                            | 9755.7287                                      | -5.7                           |
|                 |              |                 | 6    | 2    | $\leftarrow$ | 6     | 2         | 9191.0933                                              | -1.9                           | -                                                      | -                              | 9535.0165                                      | -0.3                           | 9564.3402                                      | -4.1                           |
|                 |              |                 | 2    | 2    | $\leftarrow$ | 2     | 2         | -                                                      | -                              | -                                                      | -                              | 9768.9491                                      | -1.0                           | 9760.9353 <sup>b</sup>                         | -                              |
|                 |              |                 | 2    | 2    | $\leftarrow$ | 2     | 2         | -                                                      | -                              | -                                                      | -                              | 9606.3948                                      | 0.2                            | 9622.7686                                      | -1.0                           |
|                 |              |                 | 4    | 2    | $\leftarrow$ | 4     | 2         | 9411.8549                                              | -1.9                           | 9404.1505                                              | 0.2                            | 9755.6945                                      | 1.1                            | 9747.4302                                      | -2.8                           |
|                 |              |                 | 4    | 2    | $\leftarrow$ | 4     | 2         | 9410.8907                                              | 3.0                            | 9403.3378                                              | -0.7                           | 9754.7546                                      | -3.7                           | 9746.6485                                      | -1.3                           |
|                 |              |                 | 4    | 2    | $\leftarrow$ | 4     | 2         | -                                                      | -                              | -                                                      | -                              | 9600.8046                                      | -0.1                           | 9616.8071                                      | -3.6                           |
|                 |              |                 | 6    | 2    | $\leftarrow$ | 6     | 2         | 9405.2327                                              | 2.6                            | 9397.8256                                              | 1.6                            | 9749.0880                                      | -4.2                           | 9741.1317                                      | 3.4                            |
|                 |              |                 | 6    | 2    | $\leftarrow$ | 6     | 2         | -                                                      | -                              | -                                                      | -                              | 9750.0176                                      | -0.7                           | 9741.9063                                      | 2.0                            |
|                 |              |                 | 6    | 2    | $\leftarrow$ | 6     | 2         | -                                                      | -                              | -                                                      | -                              | 9600.2474                                      | -3.7                           | 9616.5400                                      | -2.6                           |
|                 |              |                 | 8    | 2    | $\leftarrow$ | 8     | 2         | 9417.0851                                              | -0.1                           | 9409.3724                                              | 1.8                            | 9760.9344                                      | 3.9                            | 9752.6603                                      | -0.8                           |
|                 |              |                 | 8    | 2    | $\leftarrow$ | 8     | 2         | 9260.0070                                              | -2.6                           | 9276.7005                                              | -0.7                           | 9603.6443                                      | 2.5                            | 9619.8522                                      | 2.6                            |
|                 |              |                 | 4    | 2    | $\leftarrow$ | 4     | 2         | 9365.1532                                              | -1.8                           | 9366.0446                                              | 1.9                            | 9708.9315                                      | 0.9                            | 9709.2851                                      | -1.4                           |
|                 |              |                 | 4    | 2    | $\leftarrow$ | 4     | 2         | -                                                      | -                              | -                                                      | -                              | 9716.5976                                      | 0.2                            | 9716.8668                                      | 0.9                            |
| 6               | 2            | $\leftarrow$    | 6    | 2    | 9357.1972    | 0.4   | 9357.9634 | 2.5                                                    | 9700.9683                      | 4.2                                                    | 9701.1946                      | -2.7                                           |                                |                                                |                                |
| 6               | 2            | $\leftarrow$    | 6    | 2    | -            | -     | -         | -                                                      | 9706.0737                      | -2.9                                                   | -                              | -                                              |                                |                                                |                                |
| 6               | 2            | $\leftarrow$    | 6    | 2    | -            | -     | -         | -                                                      | 9932.2286                      | -0.5                                                   | -                              | -                                              |                                |                                                |                                |

[Continued]

<sup>a</sup>  $\Delta\nu = \nu_{\text{obs}} - \nu_{\text{calc}}$

<sup>b</sup> Line not included in fit

**Table S2** (Continued)

| $J'_{K-1K+1}$   | ← | $J''_{K-1K+1}$  | $F'$ | $I'$ | ←         | $F''$ | $I''$     | $\text{D}_2\text{O}\cdots^{79}\text{Br}^{35}\text{Cl}$ |                                | $\text{D}_2\text{O}\cdots^{81}\text{Br}^{35}\text{Cl}$ |                                | $\text{HDO}\cdots^{79}\text{Br}^{35}\text{Cl}$ |                                | $\text{HDO}\cdots^{81}\text{Br}^{35}\text{Cl}$ |                                |
|-----------------|---|-----------------|------|------|-----------|-------|-----------|--------------------------------------------------------|--------------------------------|--------------------------------------------------------|--------------------------------|------------------------------------------------|--------------------------------|------------------------------------------------|--------------------------------|
|                 |   |                 |      |      |           |       |           | $\nu_{\text{obs}}$ (MHz)                               | $\Delta\nu$ (kHz) <sup>a</sup> | $\nu_{\text{obs}}$ (MHz)                               | $\Delta\nu$ (kHz) <sup>a</sup> | $\nu_{\text{obs}}$ (MHz)                       | $\Delta\nu$ (kHz) <sup>a</sup> | $\nu_{\text{obs}}$ (MHz)                       | $\Delta\nu$ (kHz) <sup>a</sup> |
| 3 <sub>03</sub> | ← | 2 <sub>02</sub> | 8    | 2    | ←         | 8     | 2         | 9356.3771                                              | -2.9                           | 9357.3303                                              | 0.8                            | 9700.1466                                      | 0.9                            | 9700.5639                                      | -0.8                           |
|                 |   |                 | 8    | 2    | ←         | 8     | 2         | -                                                      | -                              | -                                                      | -                              | 9692.6205                                      | -3.6                           | -                                              | -                              |
|                 |   |                 | 8    | 2    | ←         | 8     | 2         | -                                                      | -                              | -                                                      | -                              | 9933.9791                                      | 1.2                            | 9897.3497                                      | -0.8                           |
|                 |   |                 | 10   | 2    | ←         | 10    | 2         | 9363.3837                                              | 1.5                            | 9364.2539                                              | 0.1                            | 9707.1527                                      | -0.9                           | -                                              | -                              |
|                 |   |                 | 10   | 2    | ←         | 10    | 2         | 9584.8748                                              | -6.0                           | 9548.5587                                              | -1.8                           | 9928.5974                                      | -0.1                           | -                                              | -                              |
|                 |   |                 | 6    | 2    | ←         | 6     | 2         | -                                                      | -                              | 9362.2486                                              | 1.7                            | 9705.1285                                      | -4.8                           | -                                              | -                              |
|                 |   |                 | 6    | 2    | ←         | 6     | 2         | -                                                      | -                              | -                                                      | -                              | 9724.3742                                      | -0.3                           | -                                              | -                              |
|                 |   |                 | 8    | 2    | ←         | 8     | 2         | 9359.7024                                              | 2.4                            | 9360.5846                                              | 5.2                            | 9703.4610                                      | 1.3                            | 9703.8110                                      | 0.6                            |
|                 |   |                 | 8    | 2    | ←         | 8     | 2         | 9367.3842                                              | 3.9                            | -                                                      | -                              | 9711.1363                                      | -3.0                           | 9711.4263                                      | 0.9                            |
|                 |   |                 | 10   | 2    | ←         | 10    | 2         | 9360.5846                                              | -0.9                           | 9361.3827                                              | -0.8                           | 9704.3422                                      | 0.4                            | 9704.6139                                      | 2.7                            |
|                 |   |                 | 10   | 2    | ←         | 10    | 2         | 9340.6871                                              | 0.1                            | -                                                      | -                              | 9684.4329                                      | 1.0                            | 9684.6428                                      | -3.5                           |
|                 |   |                 | 12   | 2    | ←         | 12    | 2         | 9362.1566                                              | 1.4                            | 9362.9366                                              | -1.0                           | 9705.9147                                      | 0.9                            | 9706.1692                                      | 2.1                            |
| 3 <sub>12</sub> | ← | 2 <sub>11</sub> | 8    | 2    | ←         | 8     | 2         | 9422.3541                                              | 8.6                            | 9416.1188                                              | -1.8                           | -                                              | -                              | -                                              | -                              |
|                 |   |                 | 8    | 2    | ←         | 8     | 2         | 9413.5261                                              | -11.4                          | 9407.9305                                              | -11.7                          | -                                              | -                              | -                                              | -                              |
|                 |   |                 | 10   | 2    | ←         | 10    | 2         | 9421.3461                                              | -10.5                          | 9415.5634                                              | -6.0                           | -                                              | -                              | -                                              | -                              |
|                 |   |                 | 6    | 2    | ←         | 6     | 2         | 9367.9295                                              | -0.2                           | 9370.8182                                              | -1.4                           | -                                              | -                              | -                                              | -                              |
|                 |   |                 | 8    | 2    | ←         | 8     | 2         | 9362.0214                                              | 3.6                            | 9364.8984                                              | 0.3                            | -                                              | -                              | -                                              | -                              |
|                 |   |                 | 10   | 2    | ←         | 10    | 2         | 9360.8807                                              | -2.7                           | 9363.7039                                              | -5.1                           | -                                              | -                              | -                                              | -                              |
| 3 <sub>13</sub> | ← | 2 <sub>12</sub> | 12   | 2    | ←         | 12    | 2         | 9366.8837                                              | 3.6                            | 9369.7395                                              | 4.0                            | -                                              | -                              | -                                              | -                              |
|                 |   |                 | 8    | 2    | ←         | 8     | 2         | 9390.1444                                              | 7.2                            | 9383.8578                                              | 4.7                            | -                                              | -                              | -                                              | -                              |
|                 |   |                 | 8    | 2    | ←         | 8     | 2         | 9380.8139                                              | 2.1                            | 9375.2374                                              | 0.2                            | -                                              | -                              | -                                              | -                              |
|                 |   |                 | 10   | 2    | ←         | 10    | 2         | 9388.6485                                              | 5.4                            | 9382.8807                                              | 4.5                            | -                                              | -                              | -                                              | -                              |
|                 |   |                 | 6    | 2    | ←         | 6     | 2         | 9335.1961                                              | -7.3                           | 9338.1142                                              | -1.1                           | -                                              | -                              | -                                              | -                              |
|                 |   |                 | 8    | 2    | ←         | 8     | 2         | 9329.2898                                              | -0.1                           | 9332.1919                                              | -0.6                           | -                                              | -                              | -                                              | -                              |
| 10              | 2 | ←               | 10   | 2    | 9328.1598 | 1.9   | 9331.0041 | -2.0                                                   | -                              | -                                                      | -                              | -                                              |                                |                                                |                                |
| 12              | 2 | ←               | 12   | 2    | 9334.1531 | -4.4  | 9337.0381 | 2.8                                                    | -                              | -                                                      | -                              | -                                              |                                |                                                |                                |

[Continued]

<sup>a</sup>  $\Delta\nu = \nu_{\text{obs}} - \nu_{\text{calc}}$

**Table S2** (Continued)

| $J'_{K-1K+1}$   | ← | $J''_{K-1K+1}$  | $F'$            | $I'$ | ←               | $F''$ | $I''$ | $\text{D}_2\text{O}\dots^{79}\text{Br}^{35}\text{Cl}$ |                                | $\text{D}_2\text{O}\dots^{81}\text{Br}^{35}\text{Cl}$ |                                | $\text{HDO}\dots^{79}\text{Br}^{35}\text{Cl}$ |                                | $\text{HDO}\dots^{81}\text{Br}^{35}\text{Cl}$ |                                |
|-----------------|---|-----------------|-----------------|------|-----------------|-------|-------|-------------------------------------------------------|--------------------------------|-------------------------------------------------------|--------------------------------|-----------------------------------------------|--------------------------------|-----------------------------------------------|--------------------------------|
|                 |   |                 |                 |      |                 |       |       | $\nu_{\text{obs}}$ (MHz)                              | $\Delta\nu$ (kHz) <sup>a</sup> | $\nu_{\text{obs}}$ (MHz)                              | $\Delta\nu$ (kHz) <sup>a</sup> | $\nu_{\text{obs}}$ (MHz)                      | $\Delta\nu$ (kHz) <sup>a</sup> | $\nu_{\text{obs}}$ (MHz)                      | $\Delta\nu$ (kHz) <sup>a</sup> |
| 4 <sub>04</sub> | ← | 3 <sub>03</sub> | 4               | 3    | ←               | 4     | 3     | 12508.0373                                            | -0.3                           | 12503.8134                                            | 0.2                            | 12966.3932                                    | -0.7                           | 12961.4620                                    | 0.1                            |
|                 |   |                 | 6               | 3    | ←               | 6     | 3     | -                                                     | -                              | 12507.9483                                            | 0.2                            | 12970.5171                                    | -3.4                           | 12965.6039                                    | -0.1                           |
|                 |   |                 | 6               | 3    | ←               | 6     | 3     | -                                                     | -                              | -                                                     | -                              | -                                             | -                              | 12950.6315                                    | 2.3                            |
|                 |   |                 | 8               | 3    | ←               | 8     | 3     | 12516.4168                                            | 2.5                            | 12512.1760                                            | 0.8                            | 12974.7759                                    | -1.4                           | 12969.8290                                    | -0.6                           |
|                 |   |                 | 6               | 3    | ←               | 6     | 3     | 12510.4166                                            | -1.8                           | 12506.4615                                            | -0.6                           | -                                             | -                              | 12964.1383                                    | 2.2                            |
|                 |   |                 | 8               | 3    | ←               | 8     | 3     | 12510.3015                                            | 1.7                            | 12506.3415                                            | -3.2                           | 12968.6955                                    | -1.5                           | 12964.0185                                    | -3.2                           |
|                 |   |                 | 10              | 3    | ←               | 10    | 3     | 12515.1570                                            | -1.7                           | 12511.1141                                            | -4.5                           | 12973.5563                                    | 2.1                            | 12968.8034                                    | 9.2                            |
|                 |   |                 | 10              | 3    | ←               | 10    | 3     | -                                                     | -                              | 12423.5634                                            | -2.5                           | 12870.0399                                    | -2.5                           | 12881.1451                                    | -4.9                           |
|                 |   |                 | 6               | 3    | ←               | 6     | 3     | 12489.1927                                            | -1.2                           | 12489.1274                                            | -4.3                           | 12947.5567                                    | 1.0                            | -                                             | -                              |
|                 |   |                 | 8               | 3    | ←               | 8     | 3     | 12485.8905                                            | -0.7                           | -                                                     | -                              | 12944.2451                                    | -4.2                           | 12943.4647                                    | 0.8                            |
|                 |   |                 | 10              | 3    | ←               | 10    | 3     | 12486.5588                                            | -8.2                           | 12486.6012                                            | 8.4                            | 12944.9312                                    | 5.9                            | 12944.2451                                    | 3.6                            |
|                 |   |                 | 12              | 3    | ←               | 12    | 3     | 12489.6755                                            | 2.8                            | 12489.6410                                            | -3.5                           | 12948.0325                                    | -0.9                           | 12947.2968                                    | 1.7                            |
|                 |   |                 | 8               | 3    | ←               | 8     | 3     | 12488.2594                                            | -4.2                           | -                                                     | -                              | -                                             | -                              | 12945.8864 <sup>b</sup>                       | -                              |
|                 |   |                 | 10              | 3    | ←               | 10    | 3     | 12487.3069                                            | -1.0                           | 12487.2500                                            | 0.2                            | 12945.6620                                    | 0.1                            | 12944.8890                                    | -5.2                           |
|                 |   |                 | 12              | 3    | ←               | 12    | 3     | 12488.2740                                            | 2.9                            | -                                                     | -                              | -                                             | -                              | 12945.8483                                    | -5.7                           |
|                 |   |                 | 4 <sub>13</sub> | ←    | 3 <sub>12</sub> | 14    | 3     | ←                                                     | 14                             | 3                                                     | 12489.0679                     | 6.1                                           | 12488.9895                     | -1.0                                          | 12947.4188                     |
| 10              | 3 | ←               |                 |      |                 | 10    | 3     | 12538.9893                                            | -1.5                           | 12534.4893                                            | 7.7                            | -                                             | -                              | -                                             | -                              |
| 10              | 3 | ←               |                 |      |                 | 10    | 3     | 12522.9684                                            | 2.6                            | 12520.5505                                            | 7.6                            | -                                             | -                              | -                                             | -                              |
| 12              | 3 | ←               |                 |      |                 | 12    | 3     | 12527.2198                                            | -0.1                           | 12524.7090                                            | 0.9                            | -                                             | -                              | -                                             | -                              |
| 10              | 3 | ←               |                 |      |                 | 10    | 3     | 12502.2351                                            | 4.2                            | 12503.1704                                            | 6.0                            | -                                             | -                              | -                                             | -                              |
| 12              | 3 | ←               |                 |      |                 | 12    | 3     | 12502.3861                                            | -0.8                           | 12503.3098                                            | -3.1                           | -                                             | -                              | -                                             | -                              |
| 4 <sub>14</sub> | ← | 3 <sub>13</sub> | 14              | 3    | ←               | 14    | 3     | 12505.1629                                            | 2.4                            | 12506.0881                                            | -2.6                           | -                                             | -                              | -                                             | -                              |
|                 |   |                 | 8               | 3    | ←               | 8     | 3     | 12472.6744                                            | 2.6                            | -                                                     | -                              | -                                             | -                              | -                                             | -                              |
|                 |   |                 | 8               | 3    | ←               | 8     | 3     | 12490.5141                                            | -0.4                           | -                                                     | -                              | -                                             | -                              | -                                             | -                              |
|                 |   |                 | 10              | 3    | ←               | 10    | 3     | -                                                     | -                              | 12491.1339                                            | -1.8                           | -                                             | -                              | -                                             | -                              |

[Continued]

<sup>a</sup>  $\Delta\nu = \nu_{\text{obs}} - \nu_{\text{calc}}$

<sup>b</sup> Line not included in fit

**Table S2** (Continued)

| $J'_{K-1K+1}$   | $\leftarrow$ | $J''_{K-1K+1}$  | $F'$ | $I'$ | $\leftarrow$ | $F''$ | $I''$ | $\text{D}_2\text{O}\cdots^{79}\text{Br}^{35}\text{Cl}$ |                                | $\text{D}_2\text{O}\cdots^{81}\text{Br}^{35}\text{Cl}$ |                                | $\text{HDO}\cdots^{79}\text{Br}^{35}\text{Cl}$ |                                | $\text{HDO}\cdots^{81}\text{Br}^{35}\text{Cl}$ |                                |
|-----------------|--------------|-----------------|------|------|--------------|-------|-------|--------------------------------------------------------|--------------------------------|--------------------------------------------------------|--------------------------------|------------------------------------------------|--------------------------------|------------------------------------------------|--------------------------------|
|                 |              |                 |      |      |              |       |       | $\nu_{obs}$ (MHz)                                      | $\Delta\nu$ (kHz) <sup>a</sup> | $\nu_{obs}$ (MHz)                                      | $\Delta\nu$ (kHz) <sup>a</sup> | $\nu_{obs}$ (MHz)                              | $\Delta\nu$ (kHz) <sup>a</sup> | $\nu_{obs}$ (MHz)                              | $\Delta\nu$ (kHz) <sup>a</sup> |
| 4 <sub>14</sub> | $\leftarrow$ | 3 <sub>13</sub> | 8    | 3    | $\leftarrow$ | 8     | 3     | 12479.4869                                             | 0.8                            | -                                                      | -                              | -                                              | -                              | -                                              | -                              |
|                 |              |                 | 10   | 3    | $\leftarrow$ | 10    | 3     | 12479.3936                                             | -2.8                           | 12476.9939                                             | 1.4                            | -                                              | -                              | -                                              | -                              |
|                 |              |                 | 12   | 3    | $\leftarrow$ | 12    | 3     | 12483.6581                                             | 1.6                            | 12481.1664                                             | 2.3                            | -                                              | -                              | -                                              | -                              |
|                 |              |                 | 8    | 3    | $\leftarrow$ | 8     | 3     | 12461.5056                                             | -0.5                           | -                                                      | -                              | -                                              | -                              | -                                              | -                              |
|                 |              |                 | 10   | 3    | $\leftarrow$ | 10    | 3     | 12458.6563                                             | -4.5                           | 12459.6117                                             | -3.1                           | -                                              | -                              | -                                              | -                              |
|                 |              |                 | 12   | 3    | $\leftarrow$ | 12    | 3     | 12458.8166                                             | -1.3                           | 12459.7605                                             | -3.8                           | -                                              | -                              | -                                              | -                              |
|                 |              |                 | 14   | 3    | $\leftarrow$ | 14    | 3     | 12461.5938                                             | 0.8                            | 12462.5420                                             | -1.5                           | -                                              | -                              | -                                              | -                              |

<sup>a</sup>  $\Delta\nu = \nu_{obs} - \nu_{calc}$
